# Supplementary material
Source: MDPI journal article supplement (https://www.mdpi.com/2813-1053/2/1/2)
Supplement: s1 [file s1]

**Table S1.** Hazard Ratios of the association of baseline clinical and demographic characteristics with the adjusted risk of incident fall or incident mortality.

|                                  | Incident Fall                                            |                                                          | Incident Mortality                                       |                                                          |
|----------------------------------|----------------------------------------------------------|----------------------------------------------------------|----------------------------------------------------------|----------------------------------------------------------|
| Demographics – <i>n</i> (%)      | Adjusted Hazard Ratio (95% Confidence Interval), p-value |
| Age (years)                      | 1.03 (1.00, 1.05), p=0.048                               | 1.03 (1.00, 1.05), p=0.040                               | 1.08 (1.05, 1.16), p<0.0001                              | 1.09 (1.06, 1.12), p<0.0001                              |
| Female sex                       | 1.69 (1.03, 2.80), p=0.039                               | 1.65 (0.99, 2.73), p=0.050                               | 0.84 (0.49, 1.44), p=0.536                               | 0.81 (0.48, 1.39), p=0.452                               |
| Non-white race                   | 3.05 (1.33, 6.98), p=0.008                               | 3.30 (1.46, 7.50), p=0.004                               | 2.42 (1.0, 5.84), p=0.050                                | 2.74 (1.17, 6.43), p=0.021                               |
| Age-Related Macular Degeneration | 0.91 (0.43, 1.95), p=0.818                               | 0.89 (0.42, 1.90), p=0.763                               | 0.76 (0.38, 1.53), p=0.445                               | 0.72 (0.36, 1.45), 0.358                                 |
| Cataracts                        | 0.33 (0.18, 0.58), p<0.0001                              | 0.33 (0.18, 0.59), p<0.0001                              | 1.18 (0.70, 1.96), p=0.537                               | 1.28 (0.77, 2.11), p=0.336                               |
| Diabetic retinopathy             | 0.69 (0.31, 1.53), p=0.358                               | 0.67 (0.30, 1.50), p=0.327                               | 1.75 (0.81, 3.79), p=0.154                               | 1.74 (0.76, 3.96), p=0.190                               |
| Cardiovascular disease           | 2.50 (1.42, 4.39), p=0.001                               | 2.55 (1.45, 4.51), p=0.001                               | 2.32 (1.34, 4.01), p=0.003                               | 2.38 (1.37, 4.12), p=0.002                               |
| Cerebrovascular disease          | 1.55 (0.92, 2.63), p=0.103                               | 1.51 (0.89, 2.57), 0.129                                 | 1.22 (0.71, 2.12), p=0.468                               | 1.21 (0.70, 2.09), p=0.494                               |
| Diabetes mellitus                | 1.32 (0.77, 2.26), p=0.306                               | 1.32 (0.78, 2.26), p=0.303                               | 1.09 (0.60, 1.96), p=0.778                               | 1.06 (0.59, 1.90), p=0.844                               |
| Hypertension                     | 2.14 (0.97, 4.72), p=0.060                               | 2.14 (0.97, 4.72), p=0.058                               | 0.68 (0.38, 1.23), p=0.206                               | 0.69 (0.38, 1.24), p=0.217                               |
| Dementia                         | 3.09 (1.57, 6.08), p=0.001                               | 3.16 (1.61, 6.23), p=0.001                               | 1.10 (0.50, 2.43), p=0.817                               | 1.12 (0.50, 2.49), p=0.782                               |
| Polypharmacy                     | 0.99 (0.44, 2.19), p=0.974                               | 1.07 (0.47, 2.41), p=0.875                               | 1.08 (0.49, 2.41), p=0.847                               | 1.17 (0.54, 2.58), p=0.688                               |
| logMAR visual acuity             | 1.36 (1.06, 1.73), p=0.014                               | Not applicable                                           | 1.44 (1.15, 1.82), p=0.002                               | Not applicable                                           |
| Visual acuity >=20/200           | Not applicable                                           | 1.80 (1.05, 3.07), p=0.032                               | Not applicable                                           | 2.16 (1.29, 3.63), p=0.004                               |
